# Supplementary material for: The prognostic role of the Transducin-like Enhancer of split protein family in lung adenocarcinoma
Source: PubMed Central journal article supplement — Transl Lung Cancer Res. 2021 Jul;10(7):3251–63. doi: 10.21037/tlcr-21-582 (PMC8350083; doi:10.21037/tlcr-21-582), 2021-07
Supplement: tlcr-10-07-3251-supplementary.pdf [file tlcr-10-07-3251-supplementary.pdf]

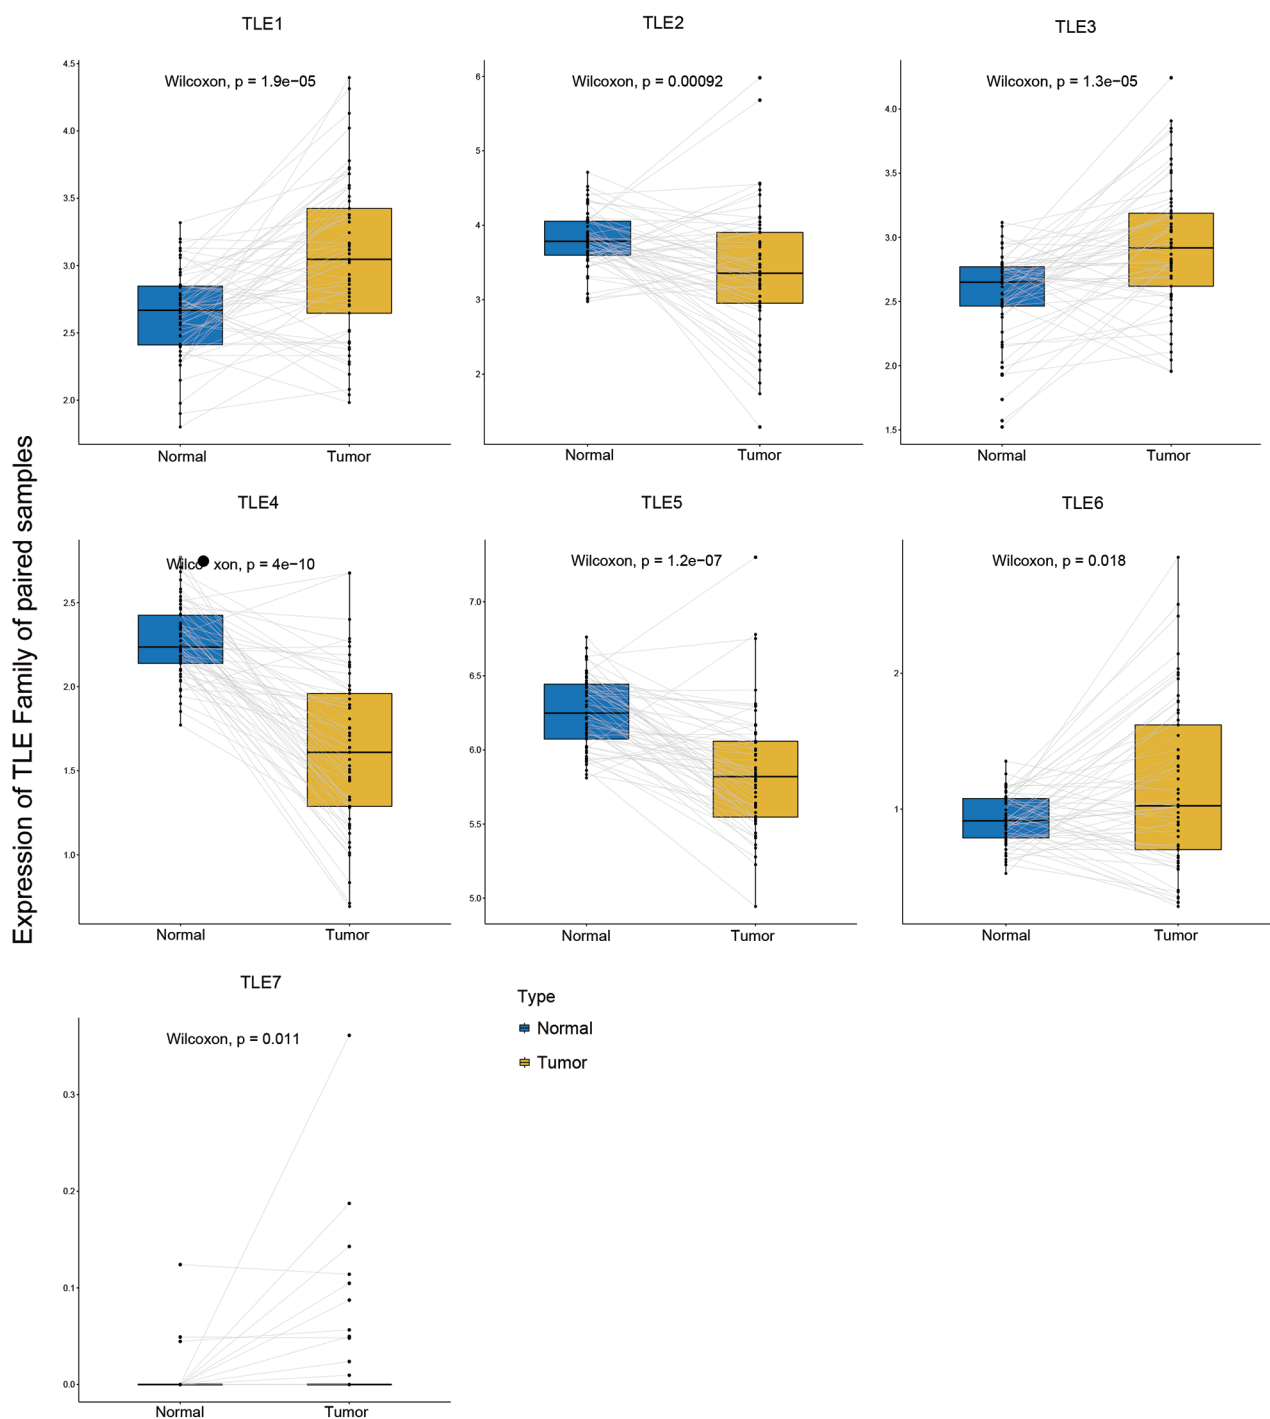

**Figure S1** The expression levels of TLEs in TCGA of patients with LUAD in paired normal and tumor tissues. The x-axis represents the sample type; the y-axis represents the TLE expression level. The different expression levels of TLE 1–7 in normal (n=57) and tumor (n=57) tissues. TLE, Transducin-like Enhancer of split; TCGA, The Cancer Genome Atlas; LUAD, lung adenocarcinoma.

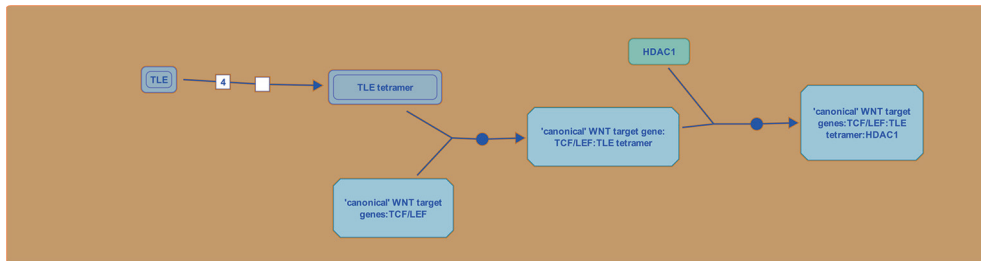

**Figure S2** A model illustrating the relationship between the TLE family members and the Wnt pathway. TLE, Transducin-like Enhancer of split.
